# Supplementary material
Source: Springer Nature journal article supplement (https://www.springermedizin.de/resource/supplementary/12885_2013_3931_MOESM6_ESM.pdf/9464770)
Supplement: MOESM6 [file 9464770]

**A**

Myc target genes

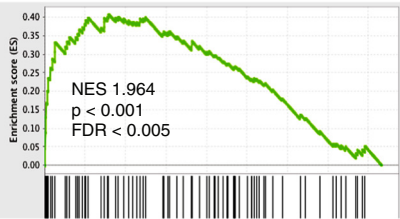

rhabdoid tumor plus SAHA

**B**

Rb associated genes

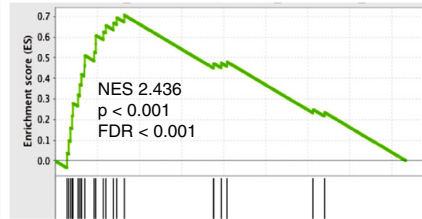

rhabdoid tumor plus SAHA

**C**

Stem cell-associated genes

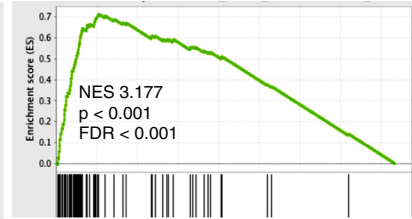

rhabdoid tumor plus SAHA
